# Supplementary material for: Calcification Propensity (T50) Predicts a Rapid Decline of Renal Function in Kidney Transplant Recipients
Source: MDPI journal article supplement (doi:10.3390/jcm12123965), 2023-06-10
Supplement: s1 [file s1]

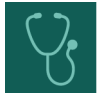

**Table S1.** Predictors of decline of renal function by univariable analysis.

|                                       | HR        | 95% CI     | p Value |
|---------------------------------------|-----------|------------|---------|
| Age (per 10 years)                    | 1.01      | 0.98–1.04  | 0.54    |
| Sex                                   |           |            |         |
| Male                                  | Reference |            |         |
| Female                                | 1.14      | 0.48–2.68  | 0.77    |
| eGFR                                  |           |            |         |
| >60 mL/min/1.73 m <sup>2</sup>        | Reference |            |         |
| ≥45 & < 60 mL/min/1.73 m <sup>2</sup> | 0.41      | 0.08–2.11  | 0.28    |
| <45 & ≥30 mL/min/1.73 m <sup>2</sup>  | 0.53      | 0.12–2.33  | 0.4     |
| <30 mL/min/1.73 m <sup>2</sup>        | 0.39      | 0.04–4.32  | 0.44    |
| Albumin                               |           |            |         |
| ≥35 mmol/l                            | Reference |            |         |
| <35 mmol/l                            | 0.99      | 0.37–2.69  | 0.99    |
| Phosphate                             |           |            |         |
| ≤1.45 mmol/l                          | Reference |            |         |
| >1.45 mmol/l                          | 2.27      | 0.53–9.68  | 0.27    |
| Calcium                               |           |            |         |
| ≥2.2 mmol/l                           | Reference |            |         |
| <2.2 mmol/l                           | 2.07      | 0.49–8.83  | 0.33    |
| Bicarbonate                           |           |            |         |
| ≥22 mmol/l                            | Reference |            |         |
| <22 mmol/l                            | 0.58      | 0.13–2.45  | 0.46    |
| Albuminuria                           |           |            |         |
| <30 mg/24 h                           | Reference |            |         |
| 30–300 mg/24 h                        | 1.55      | 0.56–4.27  | 0.85    |
| >300 mg/24 h                          | 4.37      | 1.46–13.03 | 0.008   |

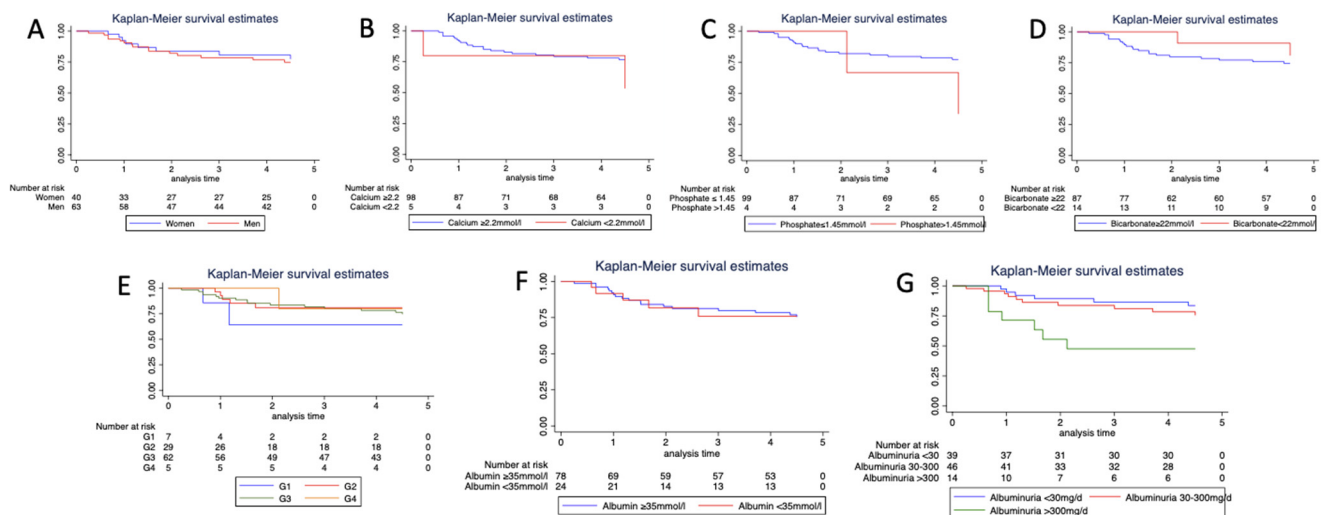

**Figure S1.** Kaplan-Meier curves of a rapid decline of renal function by (A) sex, (B) calcium, (C) phosphate, (D) bicarbonate, (E) GFR, (F) albuminemia and (G) albuminuria.
